# Supplementary material for: Integrating SNVs and CNAs on a phylogenetic tree from single-cell DNA sequencing data
Source: HighWire-hosted journal article supplement (doi:10.1101/gr.277249.122), 2023-11-01
Supplement: Supplemental_Fig_S1.pdf [file Supplemental_Fig_S1.pdf]

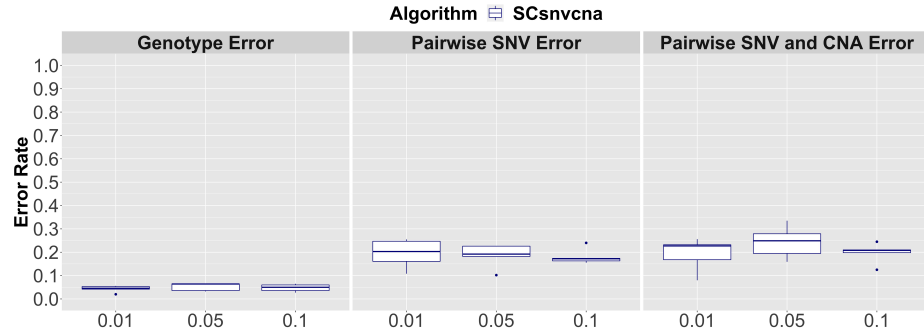

A. Varying standard deviation of the difference of CPs between SNV/CNA cells

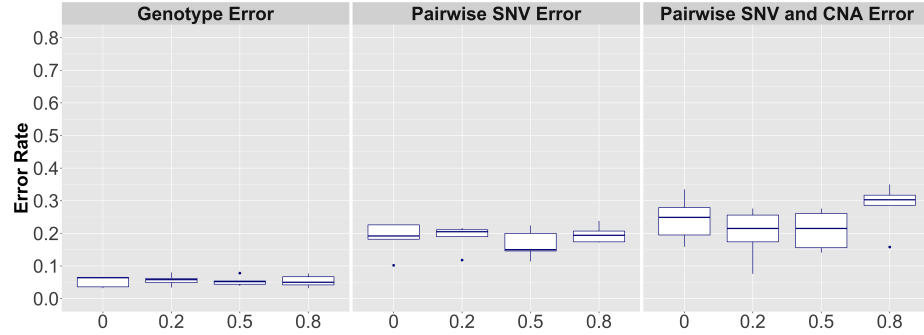

B. Additional difference of CPs between SNV/CNA cells from a Beta distribution

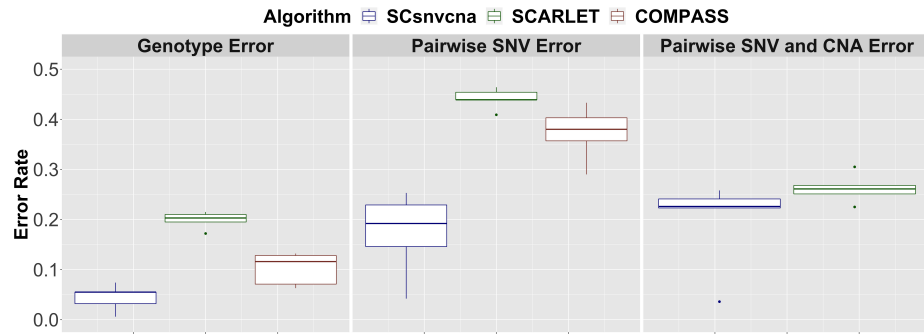

C. Both SNV/CNA cells' CPs sampled from a multinomial distribution from true CPs

**Supplemental Fig. S1** Group 4: evaluation of methods given varied CPs between CNA cells and SNV cells. Genotype error, pairwise SNV error and pairwise SNV/CNA error are shown for SCsnvcna on A. varying standard deviation of the difference of CPs between SNV/CNA cells for a Gaussian distribution, B. additional difference of CPs between SNV/CNA cells from a Beta distribution, and C. the case when both SNV/CNA cells' CPs are sampled from a multinomial distribution from true CPs.
