# Supplementary material for: Integrating SNVs and CNAs on a phylogenetic tree from single-cell DNA sequencing data
Source: HighWire-hosted journal article supplement (doi:10.1101/gr.277249.122), 2023-11-01
Supplement: Supplemental_Fig_S3.pdf [file Supplemental_Fig_S3.pdf]

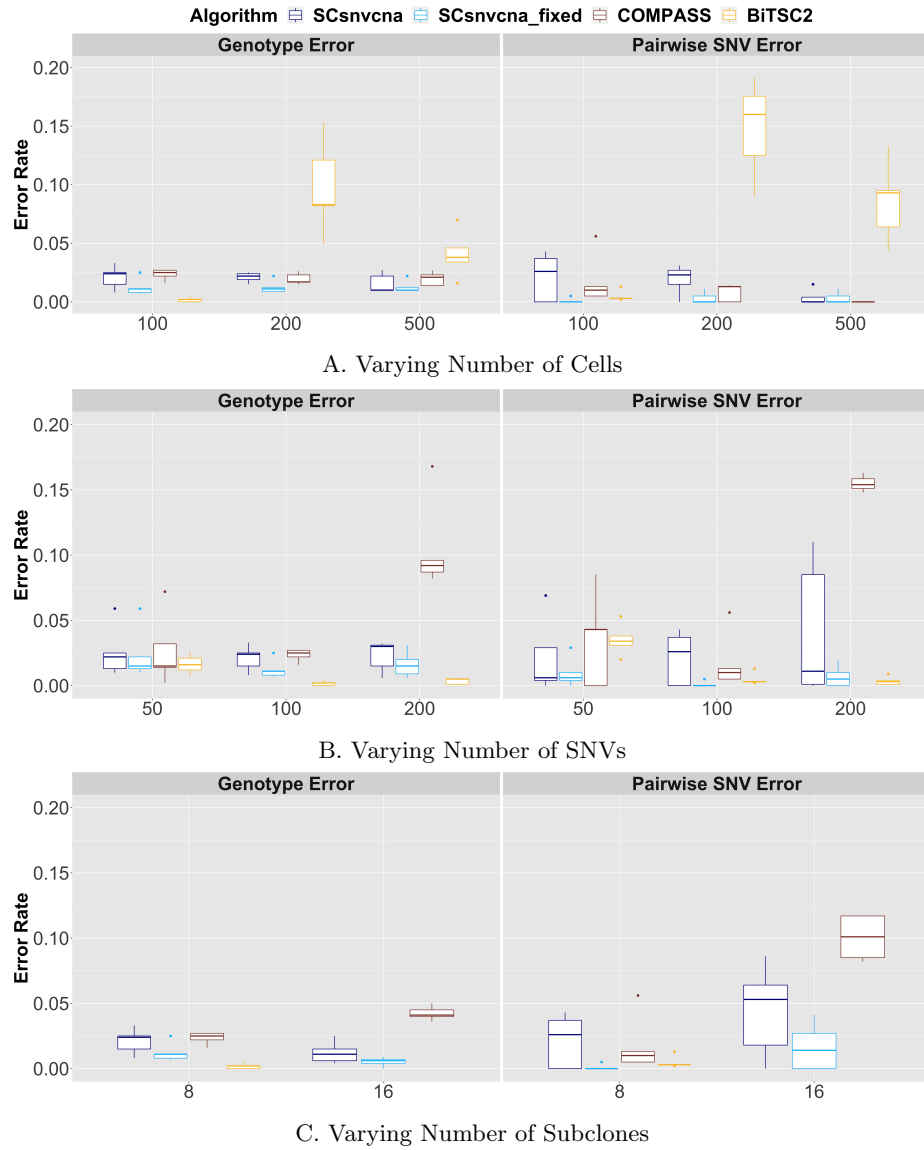

**Supplemental Fig. S3** Boxplots of genotype error and pairwise SNV error for SCsnvcna without constraining SNV cells (dark blue), SCsnvcna with constraining SNV cells (light blue), COMPASS (dark red) and BiTSC<sup>2</sup> (yellow) when A. the number of SNV cells varies; B. the number of SNVs varies; and C. the number of subclones varies. The data was simulated by a simulator different from the one proposed in this study, and thus served as an orthogonal validation.
