# Supplementary material for: Integrating SNVs and CNAs on a phylogenetic tree from single-cell DNA sequencing data
Source: HighWire-hosted journal article supplement (doi:10.1101/gr.277249.122), 2023-11-01
Supplement: Supplemental_Fig_S7.pdf [file Supplemental_Fig_S7.pdf]

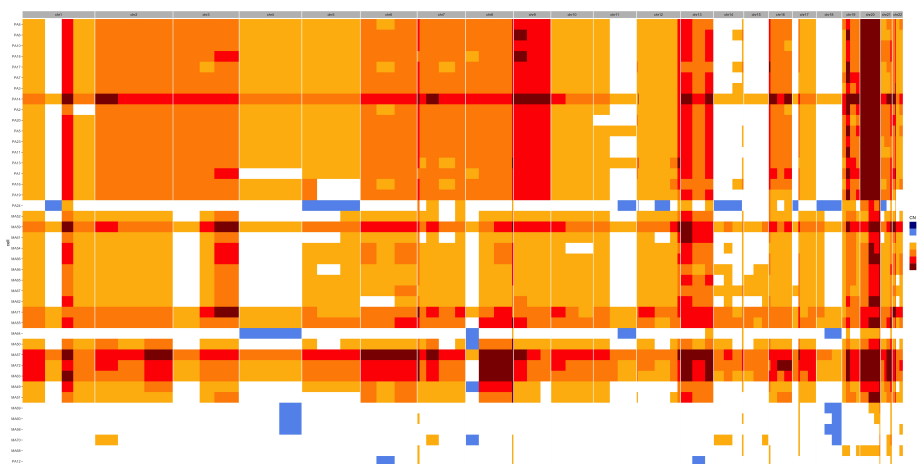

**Supplemental Fig. S7** Copy number plots for CNA cells inferred by SeCNV before ploidy correction for CRC2 patient tumor sample. Cells are sorted in the order of primary, M1, M2 and normal subclones.
