# Supplementary material for: Integrating SNVs and CNAs on a phylogenetic tree from single-cell DNA sequencing data
Source: HighWire-hosted journal article supplement (doi:10.1101/gr.277249.122), 2023-11-01
Supplement: Supplemental_Fig_S8.pdf [file Supplemental_Fig_S8.pdf]

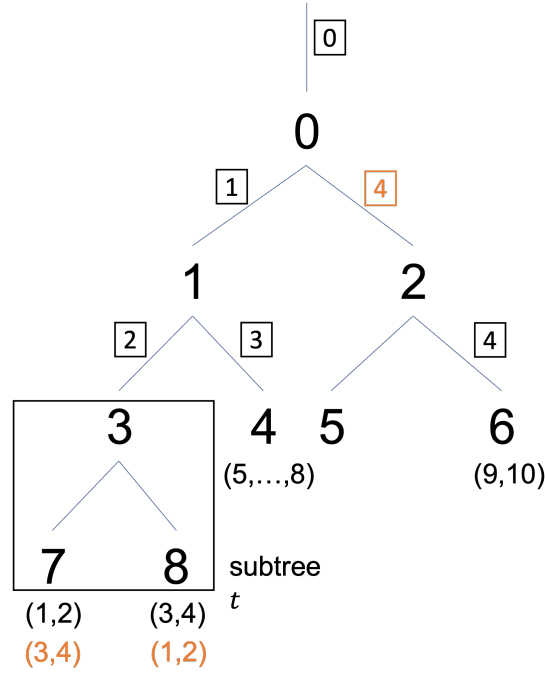

**Supplemental Fig. S8** Illustration of equally good SNV and SNV cell placements. Shown in the figure is a phylogenetic tree with the ground truth placement of SNVs (numbers inside the black boxes on the edges) and SNV cells (numbers inside the black parenthesis on the leaves). The numbers being connected by the blue lines (edges) represent the node IDs. We define the edge ID as the ID of the descendant node that the edge connects. Due to the lack of SNVs on the edges above nodes 7 and 8, cells 1-4 can be placed on either node 7 or 8 without changing the underlying genotype matrix, i.e., cells 1-4 will have SNV 0, 1 and 2 regardless whether they are placed on node 7 or 8. An equally good placement of cells 1-4 is shown in the numbers in orange inside the parenthesis. Similarly, in terms of the placement of SNVs, due to the lack of SNV cells on node 5, SNV 4 can be placed on either the edge above node 6 or the edge above node 2 without changing cell 9 and 10's underlying genotype. In another word, cell 9 and 10 will have SNV 0 and 4 regardless whether SNV 4 is placed on the edge above node 6 or the edge above node 2. An equally good placement of SNV 4 is shown in orange inside the box on the edge above node 2.
