# Supplementary material for: Integrating SNVs and CNAs on a phylogenetic tree from single-cell DNA sequencing data
Source: HighWire-hosted journal article supplement (doi:10.1101/gr.277249.122), 2023-11-01
Supplement: Supplemental_Table_S2.pdf [file Supplemental_Table_S2.pdf]

|                                                           |    |    |    |    |    |
|-----------------------------------------------------------|----|----|----|----|----|
| CNAs specific to a CNA leaf a SNV cell should contain (%) | 50 | 60 | 70 | 80 | 90 |
| SNV cells being constrained (%)                           | 29 | 28 | 15 | 14 | 14 |
| Average CNA leaves a SNV cell is constrained to (%)       | 39 | 37 | 33 | 31 | 31 |

**Supplemental Table S2** Study of the effect of a parameter: the effect of the percentage of CNAs specific to a CNA leaf that a SNV cell has to contain for it to be constrained (1st row) to the percentage of SNV cells being constrained (2nd row) and the average percentage of CNA leaves a SNV cell is constrained to (3rd row).
